# Supplementary material for: A biocompatible NIR-II light-responsive nanoknife for permanent male sterilization
Source: Royal Society of Chemistry journal article supplement (doi:10.1039/d3na00189j), 2023-01-01
Supplement: d3na00189j1.pdf [file d3na00189j1.pdf]

## A biocompatible NIR-II light-responsive nanoknife for permanent male sterilization

*Haoyu Wang,<sup>a,b,‡</sup> Xiaomeng Yue,<sup>c,‡</sup> Huanhuan Wu,<sup>a</sup> Yeda Wan,<sup>c</sup> Yujie Tong,<sup>a</sup> Yang Zhao,<sup>d</sup> Yijun Li,<sup>e</sup> and*

*Jinbin Pan<sup>a,\*</sup>*

- a. Department of Radiology, Tianjin Key Laboratory of Functional Imaging, Tianjin Medical University General Hospital, Tianjin 300052, China.
- b. Department of Radiology, Affiliated Hospital of Inner Mongolia Medical University, Hohhot 010050, China.
- c. Ultrasonic Diagnosis and Treatment Department, National Clinical Research Center of Cancer, Tianjin Cancer Hospital Aripport Hospital, Tianjin 300052, China.
- d. Department of Radiology, The Second Hospital of Tianjin Medical University, Tianjin 300211, China.
- e. Inner Mongolia Medical University, Hohhot 010050, China.

‡ These authors contributed equally to this article.

\*Corresponding authors. E-mail:[panjinbin@tmu.edu.cn](mailto:panjinbin@tmu.edu.cn)

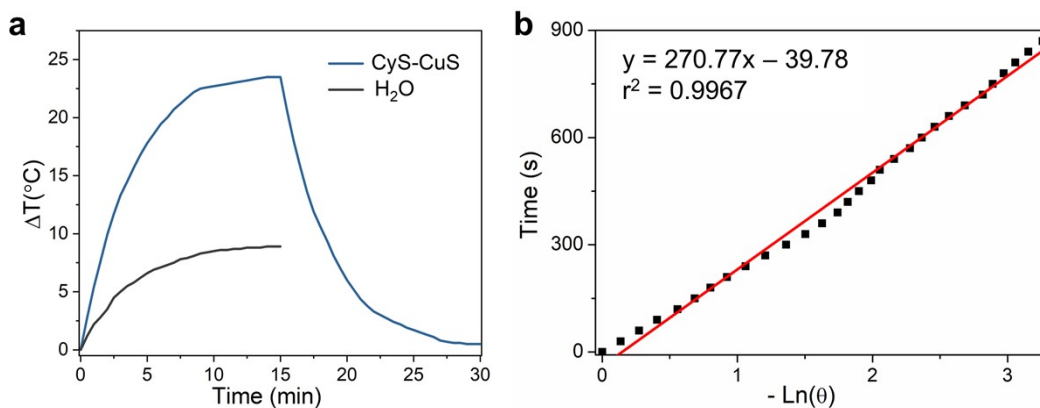

**Figure S1.** Temperature evolution curves of Cys-CuS nanosheets in a 1064 nm laser on/off cycle. a) Temperature profile of Cys-CuS solution ( $100 \text{ mg L}^{-1}$ ) under the irradiation of a 1064 nm laser ( $2.0 \text{ W cm}^{-2}$ ) for 15 min, and then the laser was turned off. b) Plot of the cooling time versus  $-\ln(\theta)$  obtained from the cooling stage in (a).

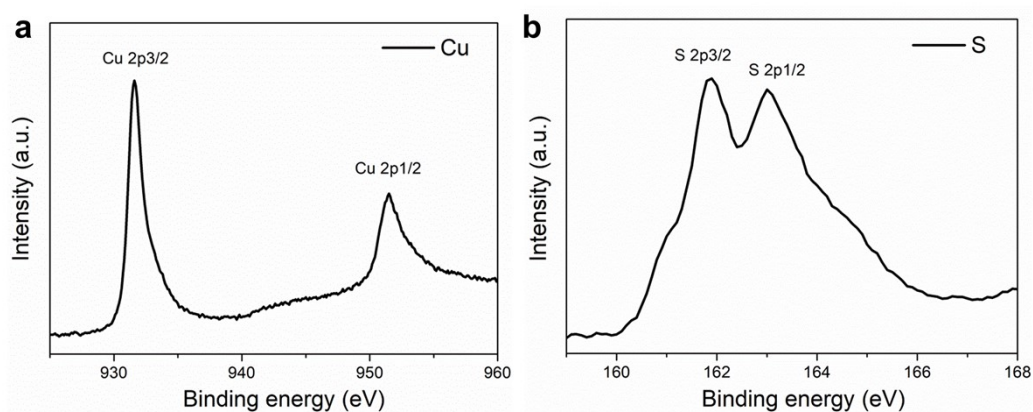

**Figure S2.** XPS spectra of (a) Cu 2p and (b) S 2p in Cys-CuS nanosheets.

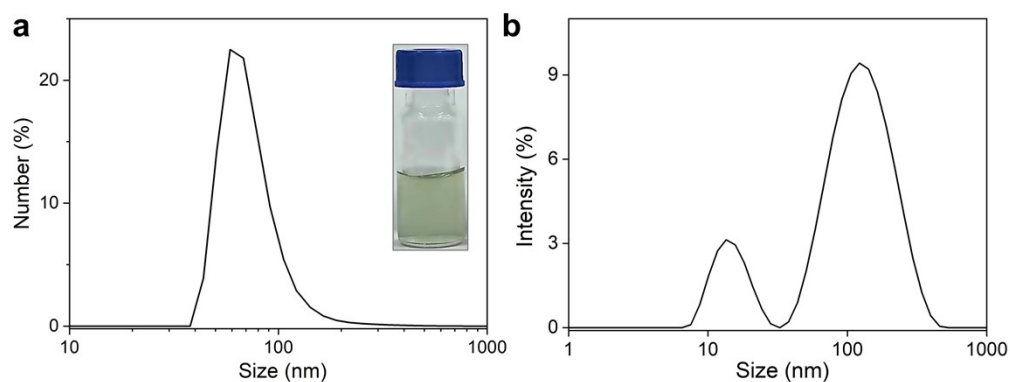

**Figure S3.** Hydrodynamic size of Cys-CuS nanosheets measured by DLS. The insert photograph is Cys-CuS aqueous solution ( $0.04 \text{ mg mL}^{-1}$ ).

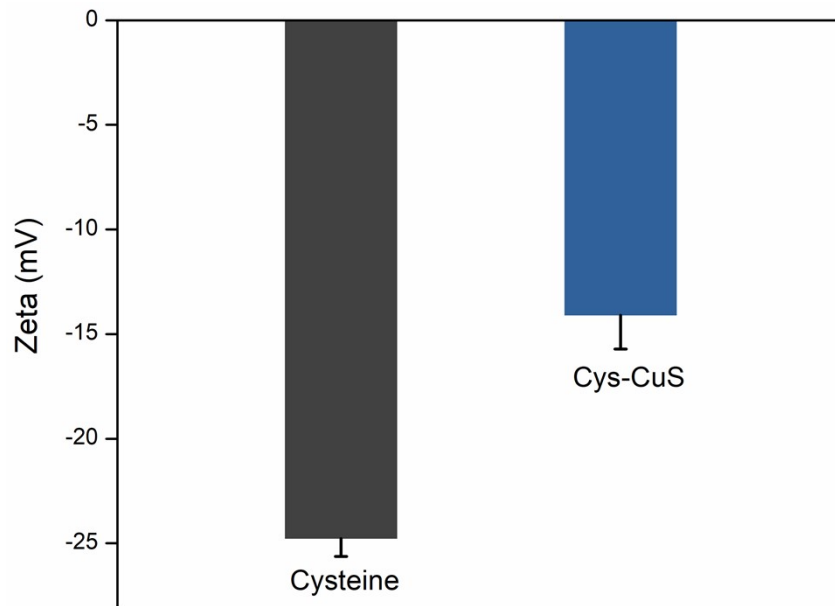

**Figure S4.** The zeta potential of Cystine and Cys-CuS nanosheets.

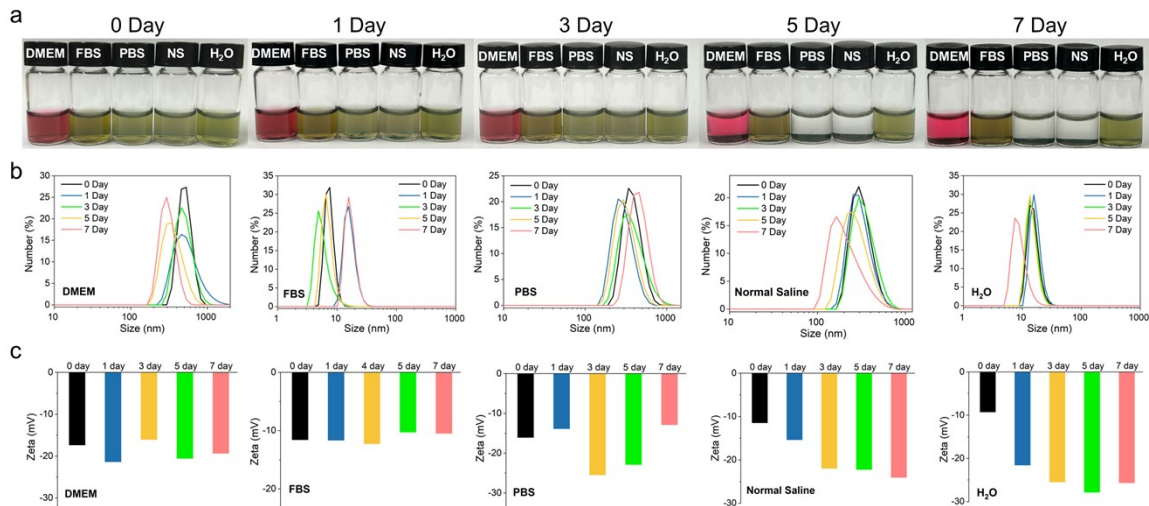

**Figure S5.** The photograph (a), DLS (b) and zeta potential (c) of Cys-CuS in PBS, normal saline, DMEM, fetal bovine serum (FBS), and deionized water at different time points (0, 1, 3, 5, 7 days)

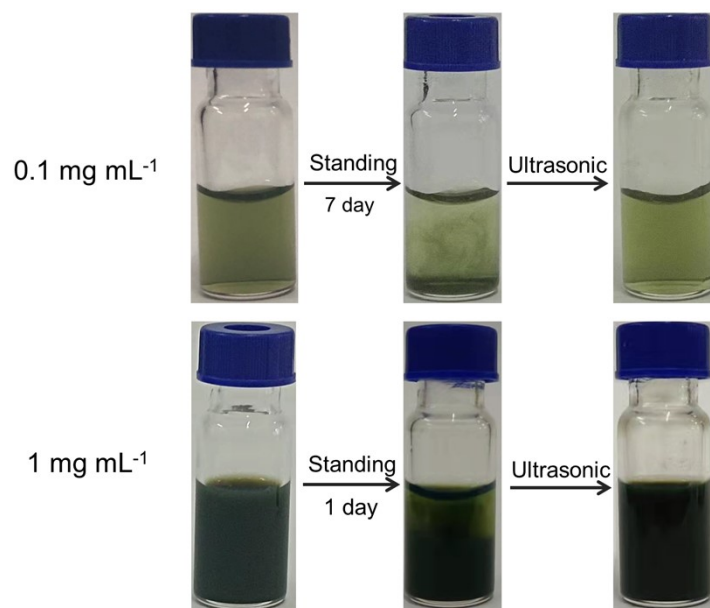

**Figure S6.** Photographs of Cys-CuS nanosheets solutions after standing for some time.

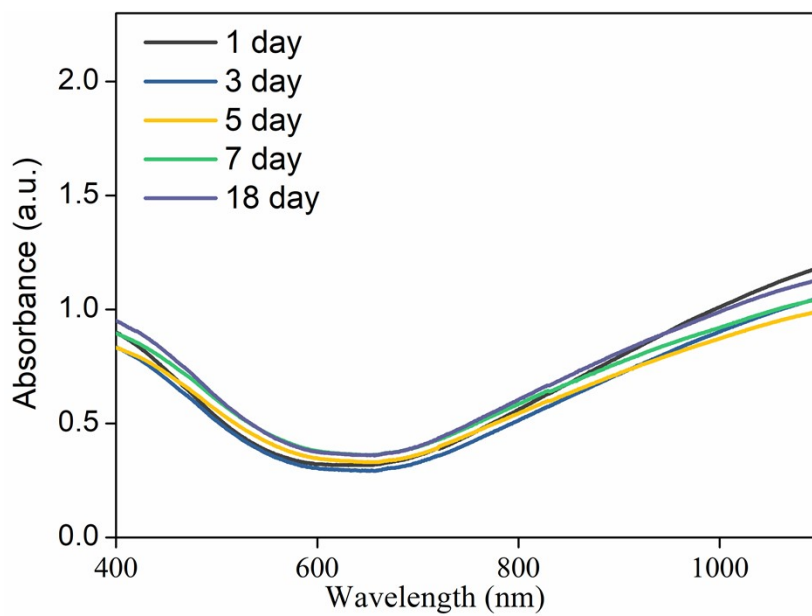

**Figure S7.** The UV-vis-NIR absorption spectra of Cys-CuS nanosheets ( $50 \text{ mg L}^{-1}$ ) solutions after store for different durations.

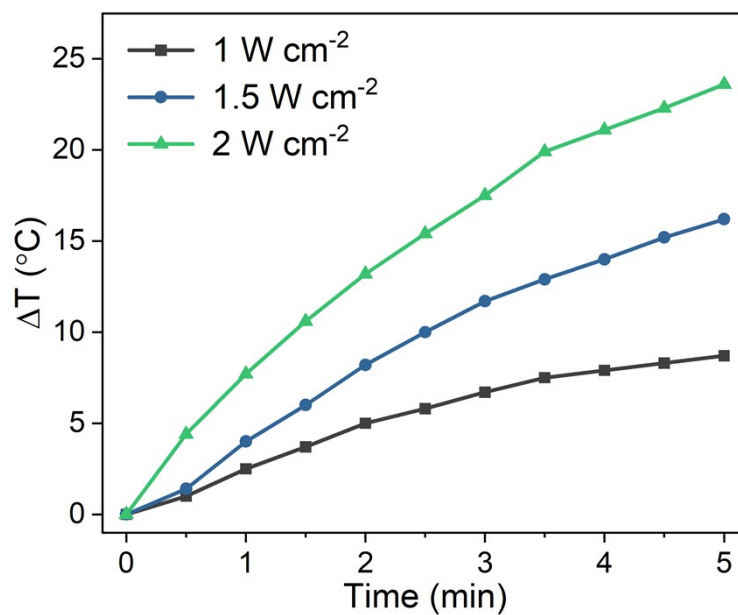

**Figure S8.** Temperature curves Cys-CuS nanosheets (200 mg L<sup>-1</sup>) solutions upon irradiation of 1064 nm laser (1, 1.5, 2.0 W cm<sup>-2</sup>, 5 min).

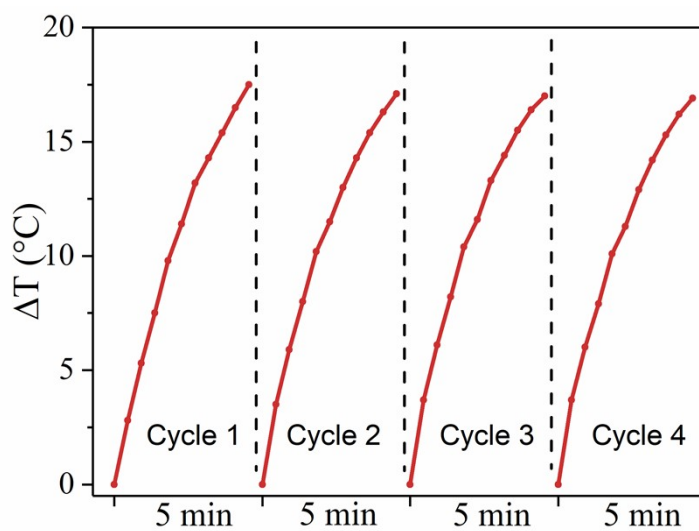

**Figure S9.** Photothermal stability of Cys-CuS nanosheets (100 mg L<sup>-1</sup>) under cyclic irradiation of 1064 nm laser (2 W cm<sup>-2</sup>).

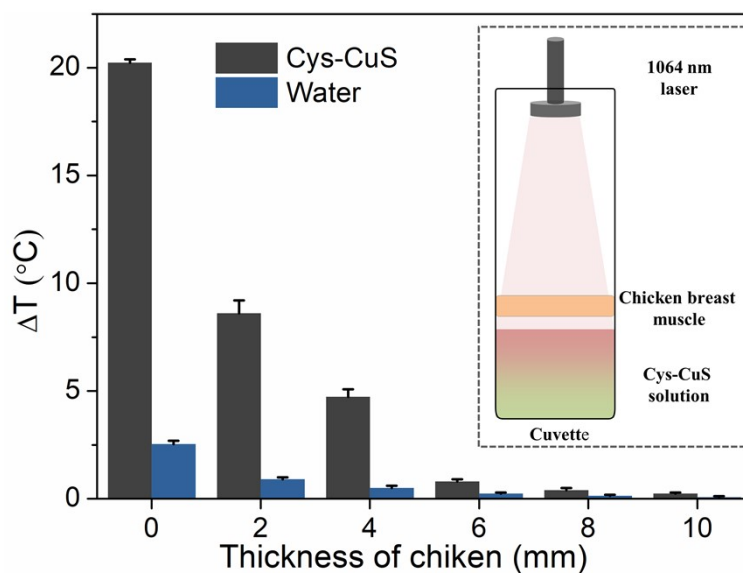

**Figure S10.** Deep-tissue photothermal study of Cys-CuS nanosheets ( $80 \text{ mg L}^{-1}$ ,  $1 \text{ mL}$ ) covered by different thicknesses of chicken breast muscle (2, 4, 6, 8, 10 mm) under a 1064 nm laser irradiation ( $1 \text{ W cm}^{-2}$ , 2 min).

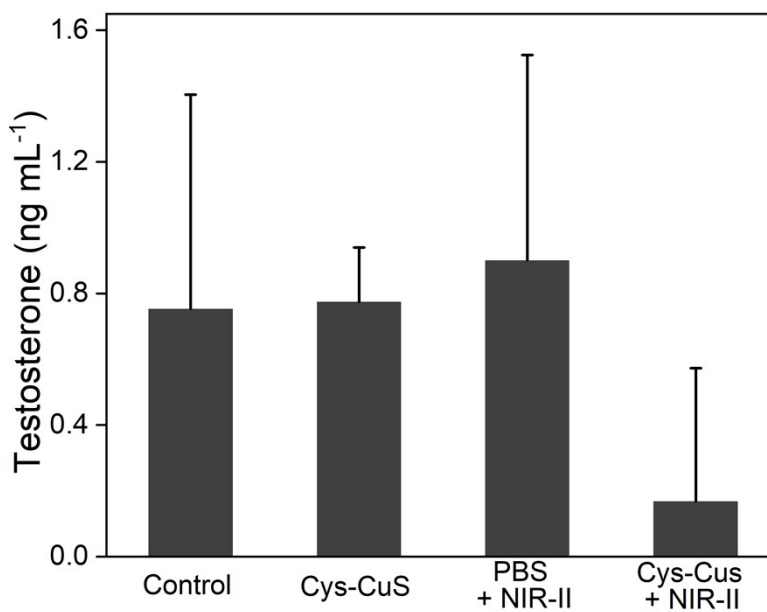

**Figure S11.** Plasma levels of testosterone in mice at 60th day post treatments.

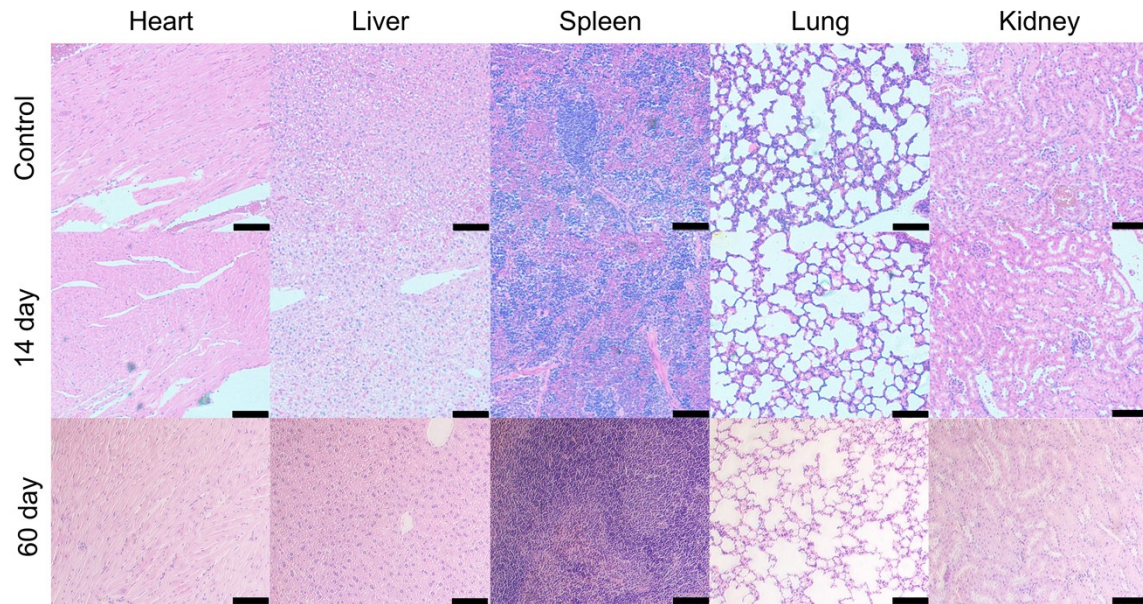

**Figure S12.** H&E staining of major organs from mice after intra-testicular injection with or without Cys-CuS nanosheets (100  $\mu\text{L}$ , 100  $\text{mg L}^{-1}$ ). (Scale bar: 100  $\mu\text{m}$ )
